# Supplementary material for: Increased CSF-decorin predicts brain pathological changes driven by Alzheimer’s Aβ amyloidosis
Source: PubMed Central journal article supplement (PMC9254429; doi:10.1186/s40478-022-01398-5), 2022-07-04

Fig. S1

a

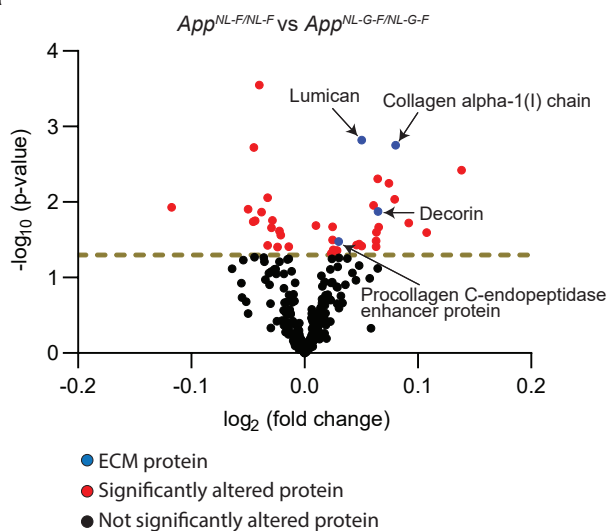

b

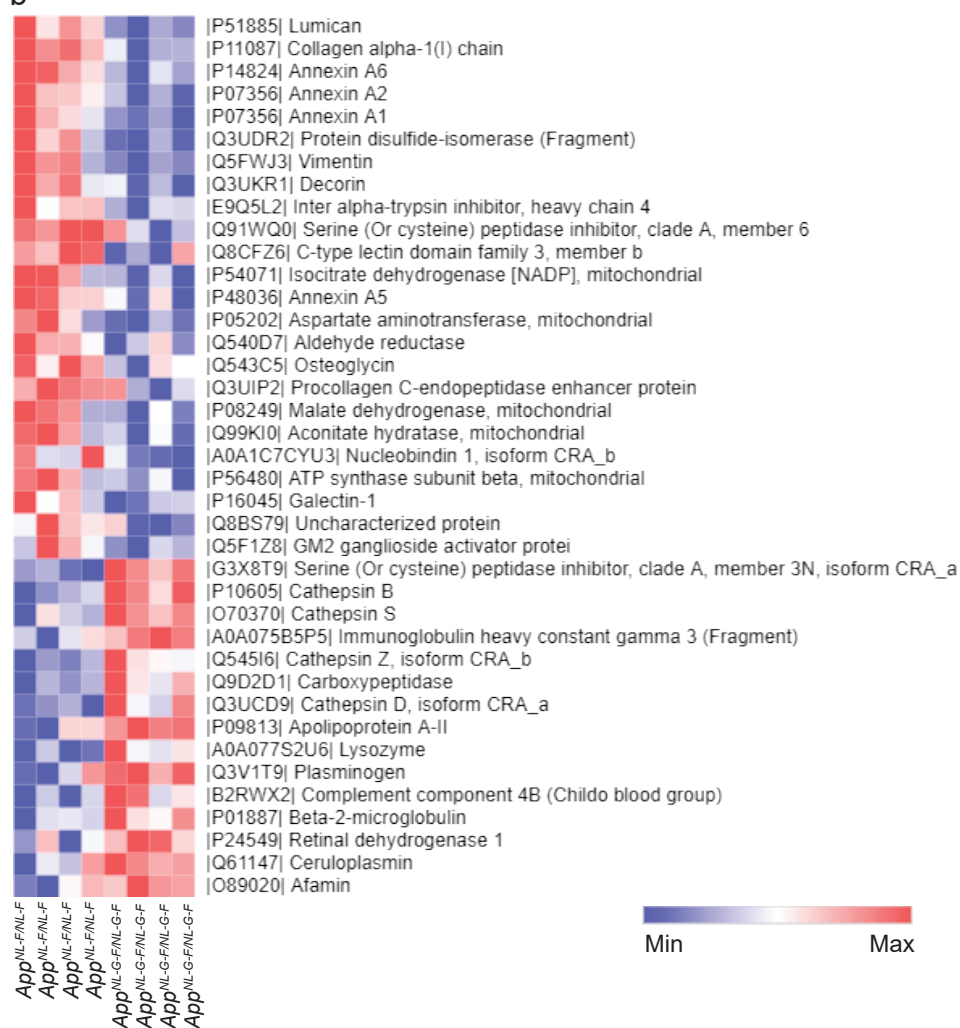

Supplement: 40478_2022_1398_MOESM4_ESM.pdf [file 40478_2022_1398_MOESM4_ESM.pdf]
