# Supplementary material for: Increased CSF-decorin predicts brain pathological changes driven by Alzheimer’s Aβ amyloidosis
Source: PubMed Central journal article supplement (PMC9254429; doi:10.1186/s40478-022-01398-5), 2022-07-04

Fig. S4

a

*App<sup>wt/wt</sup>* and *App<sup>NL-F/NL-F</sup>*

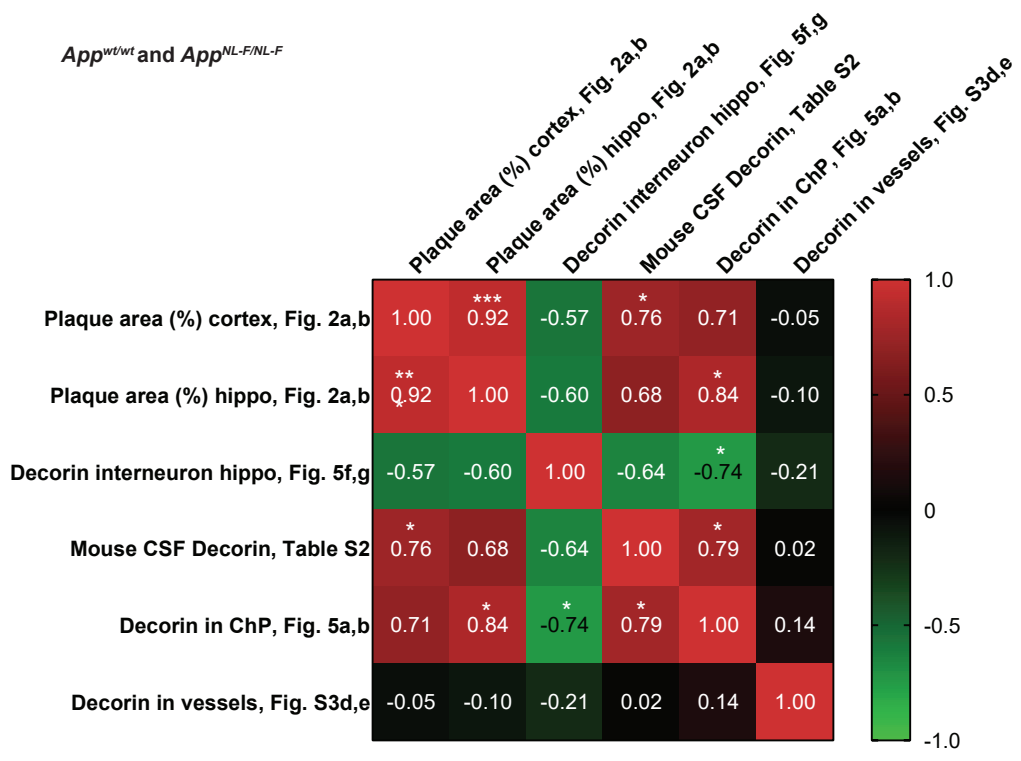

b

*App<sup>wt/wt</sup>* and *App<sup>NL-G-F/NL-G-F</sup>*

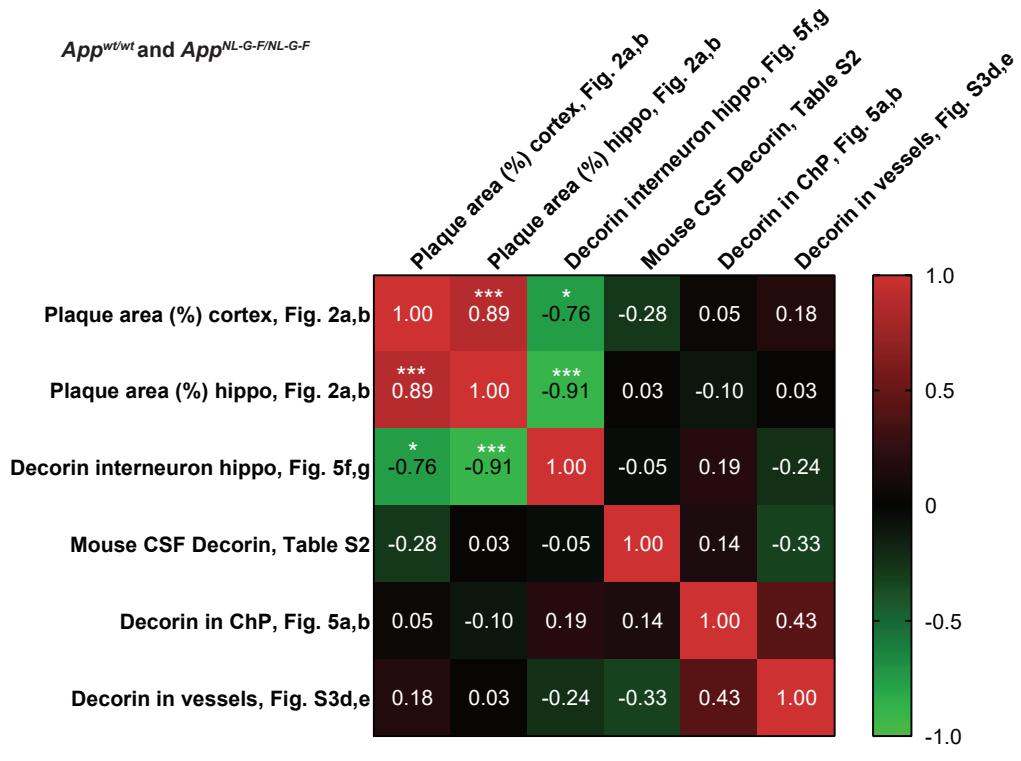

Supplement: 40478_2022_1398_MOESM11_ESM.pdf [file 40478_2022_1398_MOESM11_ESM.pdf]
